# Supplementary material
Source: HighWire-hosted journal article supplement (https://bmjopen.bmj.com/content/9/4/e025375)
Supplement: inline-supplementary-material-2 [file inline-supplementary-material-2.pdf]

Participant unique ID:

Date:

Time:

Interviewer initials:

- Can you describe in your own words the purpose of the grid?

- What is your overall impression of the grid? (layout of information, ease of use, complexity etc.)

- Based upon the information in the grid can you describe in a sentence:

- What each of the approaches is about?

- Is there one approach that is more effective than another? (Do the diagrams make sense)

- How long before someone might feel better?

- Can you receive more than one of these options?

- Do the questions and information presented make sense? (This may be answered above)

**Lifeline number: 1-800-273-8255**

**\*\*In the very unlikely event that you are concerned an interviewee might self-harm, please indicate to the interviewee that you would like to forward the call to an expert from Lifeline. If they choose not too, please offer them the Lifeline number \*\***

- Is there anything in the grid that you find confusing or poorly worded? (You can ask if there is anything else if they have identified confusing parts of the grid already)

- How would you reword things that you find unclear in the grid? (How would you say them in your own words)

- Are there other questions that you feel would be important to include?

- How helpful do you feel this grid would be in helping someone make a decision about his or her care?

- What can we do to make this grid more helpful?

- When would this best be given to the individual? Before the visit, during the visit with their clinician, at home, both?

**Thank participant; inform them that the gift card will be sent to their email address to be used on Amazon.**

**Lifeline number: 1-800-273-8255**

**\*\*In the very unlikely event that you are concerned an interviewee might self-harm, please indicate to the interviewee that you would like to forward the call to an expert from Lifeline. If they choose not too, please offer them the Lifeline number \*\***
